# Supplementary material
Source: PubMed Central journal article supplement (PMC4654310)
Supplement: cmi2014107x1.pdf [file cmi2014107x1.pdf]

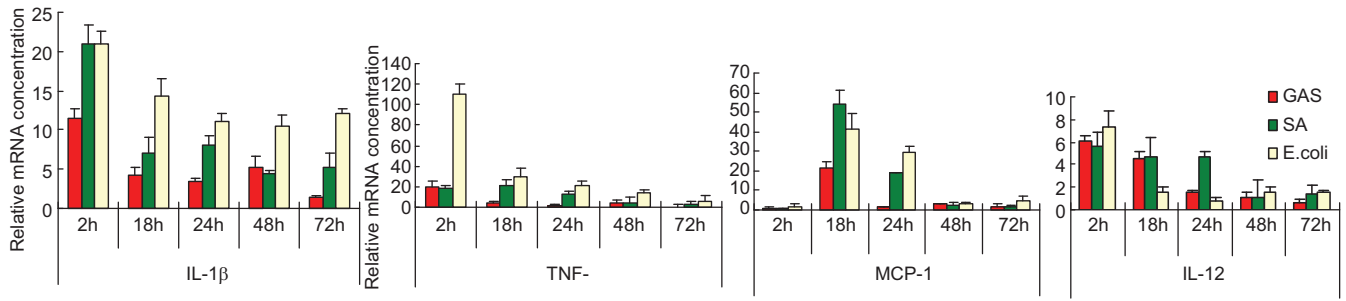

**Supplemental Figure 1** The mRNA levels of the inflammatory cytokines produced by GAS-, SA- or *E. coli*-infected BMDM cells were determined by real-time PCR. Each experiment was performed at least three times. Results are presented as mean  $\pm$  s.d.
